# Supplementary material for: Simulated spatial radiation impacts learning and memory ability with alterations of neuromorphology and gut microbiota in mice
Source: PubMed Central journal article supplement — RSC Adv. 2020 Apr 23;10(27):16196–208. doi: 10.1039/d0ra01017k (PMC9052872; doi:10.1039/d0ra01017k), 2020-04-23

**Figure S1 Sugar partiality of mice before or after radiation.** (Significant differences between the groups were tested by analysis of the independent samples t-test,  $*P < 0,05$  vs control group; before radiation, there is no difference between the control group and radiation group.)

**Figure S2 Histological score evaluation of colon** (Significant differences between the groups were tested by analysis of the independent samples t-test,  $** P < 0.01$  vs control group,  $n=4$ )

**Figure S1**

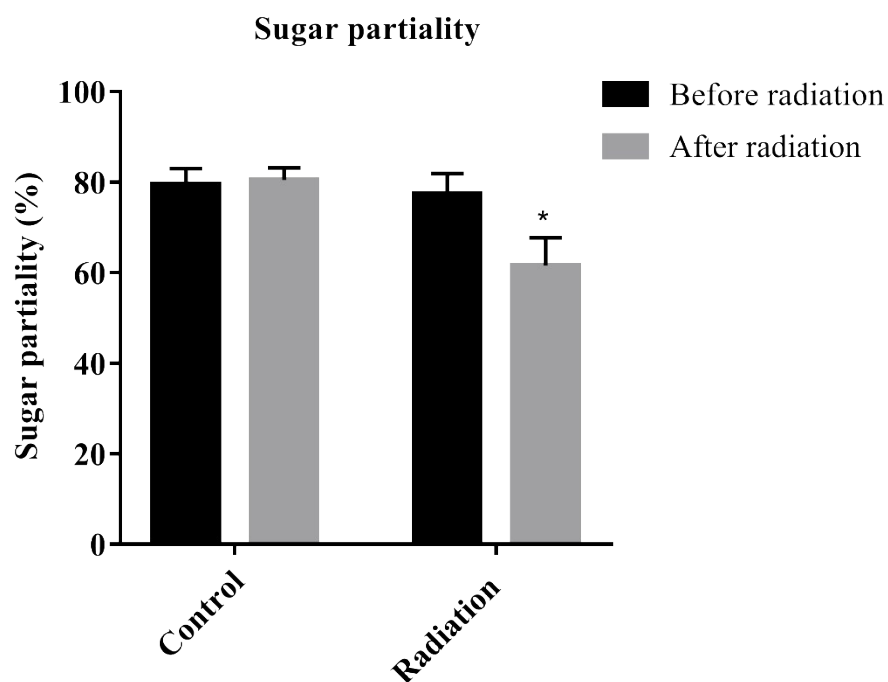

Figure S2

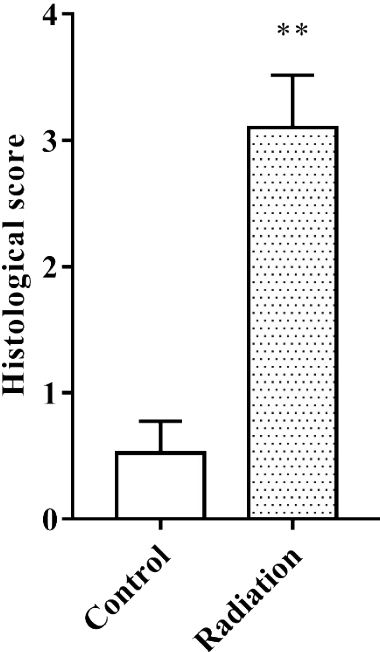

Supplement: RA-010-D0RA01017K-s001.pdf [file RA-010-D0RA01017K-s001.pdf]
